# Supplementary material
Source: PubMed Central journal article supplement (PMC10991438)
Supplement: 262_2021_2900_MOESM1_ESM.pdf [file 262_2021_2900_MOESM1_ESM.pdf]

**Supplementary Table 1. Primers used in this study**

| Gene        | PCR      | Primer          | Sequence                                                    |
|-------------|----------|-----------------|-------------------------------------------------------------|
| Universal   | cDNA     | BSL-18E         | AAAGCGGCCGCATGCTTTTTTTTTTTTTTTTTT<br>VN                     |
|             | Adaptor  | P10EA           | GGGAATTCGG                                                  |
|             | 1st, 2nd | P20EA           | TAATACGACTCCGAATTCCC                                        |
|             | Tag      | P22EA-ST1-<br>R | GTCTCGTGGGCTCGGAGATGTGTATAAGAGA<br>CAGCTAATACGACTCCGAATTCCC |
| TCR $\beta$ | 1st PCR  | CB1(2)          | GAACTGGACTTGACAGCGGAACT                                     |
|             | 2nd PCR  | CB2             | AGGCAGTATCTGGAGTCATTGAG                                     |
|             | Tag PCR  | CB-ST1-R        | TCGTCGGCAGCGTCAGATGTGTATAAGAGAC<br>AGGCTCAAACACAGCGACCTC    |
| BCR IgG     | 1st PCR  | CG1             | CACCTTGGTGTGCTGGGCTT                                        |
|             | 2nd PCR  | CG2             | TCCTGAGGACTGTAGGACAGC                                       |
|             | Tag PCR  | CG-ST1-R        | TCGTCGGCAGCGTCAGATGTGTATAAGAGAC<br>AGTGAGTTCCACGACACCGTCAC  |
